# Supplementary material
Source: Research Square preprint supplement (doi:10.21203/rs.3.rs-9793584/v1)
Supplement: Supplementary file 1 [file ebd3001ca0cdb45b8cce8df6.docx]

**Supplementary Materials**

Accounting for the Climate Cost of Physical Activity Promotion: The PA-CARBON Framework and Three Case Studies

**Included supplements:**

Supplementary File 1. PA-CARBON framework development stages

Supplementary File 2. Case-study assumptions, citation support, and climate-cost profile of the Eight Investments

Supplementary File 3. PA-CARBON six-step reporting table for the three case studies

Supplementary File 4. PA-CARBON protocol, equations, data hierarchy, and full case-study calculations

Supplementary File 5. Expanded implications, limitations, and future directions

# Supplementary File 1. PA-CARBON framework development stages

This supplementary file provides the detailed framework development stages for PA-CARBON that were condensed in the main manuscript methods section. The stages specify the parent frameworks, adaptation rules, accounting model, system boundary, counterfactual approach, emission factors and functional units, and uncertainty and no-harm safeguards that underpin the six-step PA-CARBON reporting framework.

## S1.1 Parent frameworks and adaptation rules

The Eight Investments and the PACC model were used to define the intervention universe and the expected mitigation, adaptation, health, and equity pathways [1,4]. GHG Protocol project accounting principles were used to distinguish baseline emissions, project emissions, primary and secondary effects, and GHG reductions [25,37]. ISO 14040/14044/14067 life-cycle principles were used to define system boundaries, functional units, allocation, and data-quality expectations for materials, facilities, equipment, food, and infrastructure [21-24]. WHO HEAT and active-travel LCA approaches were used to align walking/cycling outcomes with avoided motorized travel and carbon-payback logic [27,28]. Sport and event footprint studies were used to ensure that participant and spectator travel, accommodation, procurement, and logistics were represented [15-17,38].

The adaptation rules were conservative. Concepts already defined in established climate-accounting standards were not redefined; they were translated for physical-activity applications. Avoided emissions—emissions that would have occurred under a clearly specified baseline and that are prevented by the intervention—were treated as project effects and not offsets. This distinction matters because “avoided emissions” is used inconsistently across the life-cycle assessment literature: project effects are bound to the counterfactual of the evaluated strategy and reported separately from gross emissions, whereas offsets are tradable instruments intended to compensate for emissions elsewhere, a use that PA-CARBON does not support. Exhaled CO2 from exercise was excluded as a fossil-carbon source. Food was treated as incremental, attributable intake and modeled as a sensitivity analysis rather than as a fixed penalty. Infrastructure and equipment were annualized over their useful life and allocated by use. Claims of mitigation benefit required an explicit counterfactual and evidence of substitution [19,20,21-26].

## S1.2 Accounting model and operational definitions

The accounting model combines attributional and consequential logic. Gross implementation emissions are estimated attributionally: they represent emissions associated with delivering and using the strategy, including participant and staff travel, facilities, infrastructure, equipment, food and drink, water, waste, digital systems, accommodation, and operations. Induced and avoided emissions are consequently estimated based on changes relative to a baseline scenario. The central equation is: net climate cost = gross implementation emissions + induced emissions − avoided emissions.

PA-CARBON requires gross, induced, avoided, and net results to be reported separately. This is important because a strategy can have a substantial implementation footprint yet still be climate-beneficial if it displaces more emissions than it creates. Avoided emissions are treated as project effects, not offsets. A cycling intervention receives avoided-emissions credit only to the extent that measured or modeled trips replace car travel, reduce vehicle-km, reduce car ownership or use, or avoid another higher-emission activity. A community physical activity program receives avoided-emissions credit only if it is shown to replace travel to private gyms, clinical services, or other higher-carbon alternatives [21-26,37].

## S1.3 System boundary, scopes, and data hierarchy

The recommended boundary spans planning and procurement through implementation, maintenance, use, and, where applicable, end-of-life. Scope 1 includes direct fuel combustion controlled by the implementing organization. Scope 2 includes purchased electricity, heat, or cooling. Scope 3 includes participant travel, staff commuting, purchased goods and services, construction materials, food, accommodations, waste, and upstream and downstream supply chains. For many physical activity strategies, Scope 3 is expected to be the dominant category, as shown in sport/event footprint studies and transport-focused interventions [15-17,21-24].

PA-CARBON uses a four-tier data-quality hierarchy. Tier 1 data are directly measured: utility bills, fuel receipts, metered facility energy, GPS or travel-diary data, audited bills of quantities, measured attendance, and procurement records. Tier 2 data are administrative or program data: registration postcodes, facility logs, mode-share surveys, maintenance records, and official program budgets. Tier 3 data are model-based: transport models, national travel statistics, emission factor databases, activity energy expenditure estimates, and standard diet-emission factors. Tier 4 data are screening proxies: spend-based, area-based, or benchmark estimates used when detailed data are unavailable. The case studies in the main paper are screening estimates that use a mix of Tier 2 through Tier 4 inputs; audit-grade applications should replace proxies with Tier 1 and Tier 2 data.

## S1.4 Counterfactuals, attribution, and causal inference

The counterfactual is the central methodological challenge. A strategy can be credited with avoiding emissions only if the displaced baseline is clearly defined and evidence-based. Randomized trials, quasi-experimental designs, controlled natural experiments, difference-in-differences, interrupted time series, repeated cross-sectional surveys, travel diaries, accelerometry, GPS traces, registration/postcode data, vehicle-ownership data, facility logs, and transport models can all support attribution. The strength of the carbon inference should match the strength of the causal design: a controlled active-travel natural experiment can support stronger avoided-emissions claims than a cross-sectional survey; a sporting event without participant travel data should not claim a low footprint; and a community program without substitution data should conservatively report gross emissions.

The counterfactual should be specified separately for each material pathway. For travel, the baseline may be car, public transportation, walking, cycling, no trip, or a different destination. For facilities, the baseline may be no facility use, use of a private gym, use of a school or community building, or use of a pool or indoor arena. For equipment, the baseline may be shared durable goods or newly purchased personal goods. For food, the baseline may be no additional intake, partial compensation, or full compensation with a different dietary pattern.

## S1.5 Emission factors, physical activity dose, and functional units

Emission factors should be geographically and temporally appropriate and should specify whether they represent direct, well-to-tank, life-cycle, or spend-based estimates. CO2-equivalent emissions should be reported using a specified Global Warming Potential (GWP), with GWP100 as the default. Gas-by-gas or GWP20 sensitivity should be considered when methane or nitrous oxide from food systems are material [21,26]. Human exhaled CO2 is not counted as a fossil-carbon source; the relevant climate burden is the upstream fossil, land-use, and supply-chain emissions that enable or are induced by activity [20].

Physical activity outcomes should be reported in units that enable comparison across strategies: participants, participant-years, visits, active minutes, MVPA minutes, MET-hours, trips, car-km avoided, and, where appropriate, QALYs or DALYs. Activity dose can be estimated from direct measurements, validated surveys, travel diaries, or MET values from the Compendium of Physical Activities [39]. Infrastructure and equipment emissions should be annualized over the expected service life and allocated by users, visits, trips, active minutes, or resident population.

Functional units were selected to make the framework useful for physical activity journals and decision-makers. kgCO2e per participant, per visit, and per participant-year are implementation metrics; kgCO2e per active minute and per MET-hour are outcome-linked metrics; kgCO2e per car-km avoided and carbon payback are transport and infrastructure metrics; and the distribution of emissions and benefits by subgroup is an equity metric.

## S1.6 Uncertainty, sensitivity, and no-harm safeguards

Uncertainty is expected and should be reported rather than suppressed. At a minimum, PA-CARBON applications should report low, central, and high scenarios for mode substitution, car-km avoided, travel distance, car occupancy, facility energy, infrastructure lifetime, attendance, retention, equipment lifetime, food compensation, and emission factors. Probabilistic Monte Carlo analysis is preferable when sufficient input distributions are available. Food compensation is treated as a sensitivity analysis, not an automatic penalty: the relevant question is whether the intervention’s extra energy expenditure leads to additional food intake and, if so, at what diet-related emission intensity [19].

Uncertainty analysis should be paired with no-harm safeguards. A low-carbon strategy should not be deemed successful if it increases heat exposure, excludes people with disabilities, shifts risk to low-income communities, worsens safety, reduces access, or contributes to displacement. This is why PA-CARBON links climate-cost estimation to adaptation and equity checks. The purpose is not only to calculate emissions but also to redesign strategies to maximize health and climate benefits while avoiding unnecessary burdens [1,30,36].

## References

*Reference numbers correspond to the main manuscript reference list.*

1. Hinckson E, Reis R, Romanello M, et al. Benefit of physical activity initiatives for climate change mitigation and adaptation. Nature Health. 2026;1(3):300-315.

4. Milton K, Cavill N, Chalkley A, et al. Eight Investments That Work for Physical Activity. J Phys Act Health. 2021;18(6):625-630.

15. McCullough BP, Collins A, Roberts J, Villalobos S. Sport Events and Emissions Reporting: An Analysis of the Council for Responsible Sport Standard in Running Events. Sustainability. 2023;15(19):14375.

16. Wicker P. The carbon footprint of active sport participants. Sport Management Review. 2021;22(4):513-526.

17. Wilby RL, Orr M, Depledge D, et al. The impacts of sport emissions on climate: Measurement, mitigation, and making a difference. Annals of the New York Academy of Sciences. 2023;1519(1):20-33.

19. Mizdrak A, Cobiac LJ, Cleghorn CL, Woodward A, Blakely T. Fuelling walking and cycling: human powered locomotion is associated with non-negligible greenhouse gas emissions. Sci Rep. 2020;10(1):9196.

20. Ask MIT Climate. Does the carbon dioxide humans breathe out contribute to climate change? 2026. https://climate.mit.edu/ask-mit/does-carbon-dioxide-humans-breathe-out-contribute-climate-change.

21. Intergovernmental Panel on Climate Change. Climate Change 2022: Mitigation of Climate Change. Contribution of Working Group III to the Sixth Assessment Report. Cambridge: Cambridge University Press; 2022.

22-24. International Organization for Standardization. ISO 14040:2006, ISO 14044:2006, ISO 14067:2018. Environmental management - Life cycle assessment. Geneva: ISO.

25. World Resources Institute, World Business Council for Sustainable Development. The GHG Protocol for Project Accounting. Washington, DC and Geneva: WRI/WBCSD; 2005.

26. World Resources Institute, World Business Council for Sustainable Development. Global Warming Potential Values. Washington, DC: GHG Protocol; 2024.

27. Kahlmeier S, Cavill N, Thondoo M, et al. The Health Economic Assessment Tool (HEAT) for walking and cycling. Front Sports Act Living. 2023;5:1146761.

28. World Health Organization Regional Office for Europe. Health Economic Assessment Tool (HEAT) for walking and cycling. 2026. https://www.who.int/europe/tools-and-toolkits/health-economic-assessment-tool-for-walking-and-cycling.

30. Reis RS, Favarao Leao AL, Wang Y, Franco Silva M, Salvo D. Enhancing the Socioecological Model to Integrate Equity and Planetary Health. J Phys Act Health. 2026;23(4):501-514.

36. Salvo D, Jauregui A, Adlakha D, Sarmiento OL, Reis RS. When Moving Is the Only Option: The Role of Necessity Versus Choice. Annu Rev Public Health. 2023;44:151-169.

37. World Resources Institute, World Business Council for Sustainable Development. The Greenhouse Gas Protocol: A Corporate Accounting and Reporting Standard. Revised edition. Washington, DC and Geneva: WRI/WBCSD; 2004.

38. Herold DM, Breitbarth T, Hergesell A, Schulenkorf N. Sport events and the environment: Assessing the carbon footprint of spectators’ modal choices at professional football games in Austria. J Clean Prod. 2024;452:142259.

39. Ainsworth BE, Haskell WL, Herrmann SD, et al. 2011 Compendium of Physical Activities: a second update of codes and MET values. Med Sci Sports Exerc. 2011;43(8):1575-1581.

# Supplementary File 2. Case-study assumptions, citation support, and climate-cost profile of the Eight Investments

## S2.1 Case-study selection rationale

The case studies were selected to stress-test PA-CARBON across three contrasting analytic situations rather than to represent every physical activity strategy. The active-commute case isolates the avoided-car-travel mechanism; the Mini-Hollands case applies the framework to a real built-environment intervention with longitudinal and vehicle-ownership evidence; and the Academia da Saúde case tests gross-footprint accounting for a scaled community program in a middle-income country [11,40-49].

**Supplementary Table S2a. Rationale for selecting the three case studies.**

| **Selection criterion** | **How the portfolio meets the criterion** | **Why this matters for PA-CARBON** |
| --- | --- | --- |
| Contrasting carbon mechanisms | Active commute emphasizes avoided car-km; Mini-Hollands combines infrastructure and mode-shift/car-ownership effects; Academia da Saúde emphasizes gross community-program delivery. | Shows that climate cost is determined by the delivery system and counterfactual, not by physical activity itself. |
| Different evidence conditions | One hypothetical case with full transparency; one real high-income natural experiment; one real middle-income national program with official administrative data but no carbon audit. | Shows how PA-CARBON works under high, moderate, and limited data availability. |
| Relevance to the Eight Investments | Active transport, active urban design, community-wide programs, healthcare/primary-care linkage, and public education/healthy eating are represented. | Tests the framework across core domains while acknowledging that sport/events, schools, workplaces, and facilities require future applications. |
| Policy and journal relevance | The cases are recognizable to physical activity researchers and policy audiences, including JPAH readers, transport evaluators, community-program researchers, and Brazil/LMIC active-living scholars. | Supports a publishable narrative that is methodological, practical, and tied to intervention science. |
| Equity and planetary-health relevance | Academia da Saúde and the Brazilian and Global South implementation scholarship bring LMIC, community, equity, scaling, and public-sector implementation perspectives into the carbon-accounting discussion. | Avoids restricting climate-cost accounting to high-income active-travel infrastructure and aligns with the PACC and socioecological/planetary-health literature. |

## S2.2 Assumptions set for the three case studies

Each assumption is listed with the value used in the case study, its role in the calculation, the supporting citation (when available), and the uncertainty to be addressed in a formal application. Assumptions without direct empirical measurement are labeled as screening assumptions and should be replaced with local data in audit-grade work [25,26].

**Supplementary Table S2b. Case-study assumptions, supporting citations, and formal data needs. Citation numbers match the main manuscript reference list.**

| **Case** | **Assumption** | **Value used** | **Citation or rationale** | **Role** | **Uncertainty / formal data need** |
| --- | --- | --- | --- | --- | --- |
| Active commute | Regular participants | 250 workers | Hypothetical implementation parameter; chosen to illustrate a medium-sized workplace program. | Reach denominator | Replace with enrollment and attendance data. |
| Active commute | Replaced car round trips | 2/week for 40 weeks, 8 km each | Counterfactual car commute specified for illustrative project accounting. | Avoided car-km | Measure with commute survey or GPS/travel diary. |
| Active commute | Car emission factor | 0.211 kgCO2e/km | UK Government 2025 conversion factors; full fuel-cycle screening factor [A1]. | Avoided emissions | Use local vehicle fleet, fuel and occupancy data. |
| Active commute | Gross implementation emissions | 8.6 tCO2e/year | Screening assumptions for operations, equipment/materials and tactical infrastructure; replace with procurement records and LCA. | Gross emissions | Low certainty; for illustration only. |
| Active commute | Food compensation | 0, low, central and high/full scenarios | Active-travel food-emissions logic from Mizdrak et al.; walking/cycling food factors varied by scenario [19]. | Induced emissions | Use measured diet or energy-compensation data where available. |
| Active commute | Active minutes | 1,152,000 min/year | Derived from assumed walking and cycling distances at 5 km/h and 15 km/h. | Functional unit | Use accelerometry/GPS or session data if available. |
| Mini-Hollands | Intervention description | Active-travel investment in Enfield, Kingston and Waltham Forest | UK Department for Transport program description [46]. | Case definition | Use project bills and local authority records for formal LCA. |
| Mini-Hollands | Active-travel gain | 41 min/week/adult | High-exposure estimate from published longitudinal evaluation [11,47]. | PA outcome | Use local survey/accelerometer/GPS data. |
| Mini-Hollands | Vehicle ownership reduction | 23 fewer cars/vans per 1,000 adults | Published Mini-Holland LTN vehicle-ownership analysis [48]. | Avoided-driving proxy | Vehicle ownership is a proxy; actual vehicle-km should be measured. |
| Mini-Hollands | Avoided km per removed vehicle | 4,000, 6,000, 8,000 km/year | Sensitivity assumptions because annual vehicle-km avoided was not directly available in public data. | Avoided emissions | High impact uncertainty. |
| Mini-Hollands | Infrastructure cost | GBP28, GBP35 and GBP112/person scenarios | Screening cost scenarios from evaluation literature and prior draft calculations; formal study should use bills of quantities [11]. | Embodied carbon | Replace spend proxy with material LCA. |
| Mini-Hollands | Construction spend proxy | 0.322 kgCO2e/GBP | Screening spend-based proxy; lower certainty than process LCA. | Embodied carbon | Not for audited footprint. |
| Mini-Hollands | Food compensation | No, low, central, high/full scenarios | Mizdrak et al. walking/cycling food-emissions scenarios [19]. | Induced emissions | Use local dietary data. |
| Academia da Saude | Program definition | Public polos integrated into primary health care | Brazil Ministry of Health describes PAS as public spaces with infrastructure, equipment and qualified professionals [A2]. | Case definition | Use municipal implementation records. |
| Academia da Saude | Polo modality | Intermediate, 263.2 m2 | Official construction page lists Basic 250 m2, Intermediate 263.2 m2 and Expanded 451.2 m2 [A3]. | Construction footprint | Choose actual modality for each polo. |
| Academia da Saude | Network size | 1,779 accredited establishments in 2025; 582 additional units announced in 2026 | Brazil Ministry of Health 2026 announcement [A4]. | National scale | Verify at submission date. |
| Academia da Saude | Construction factor | 200 kgCO2e/m2 | Screening value between Brazilian structural benchmarks and broader building-level estimates [44]. | Embodied carbon | Replace with bill of quantities and material EPDs. |
| Academia da Saude | Electricity factor | 0.0599 kgCO2e/kWh | Brazil 2024 electricity generation average from EPE BEN 2025 [A5]. | Facility energy | Use current local grid factor if available. |
| Academia da Saude | Vehicle factor | 0.155 kgCO2e/km | ICCT life-cycle estimate for Brazilian compact/medium flex-fuel cars [A6]. | Staff/participant travel | Use local fleet and fuel mix. |
| Academia da Saude | Attendance | 10,000 visits/polo/year | Screening assumption; not an official PAS national average. | Functional unit | Replace with e-SUS/e-Gestor/local attendance data. |
| Academia da Saude | Participant travel | 10% by car, 4 km round trip | Conservative neighborhood-access scenario for screening. | Scope 3 travel | Measure with participant travel survey. |
| Academia da Saude | Food factor | 1.866 kgCO2e/1,000 kcal | Brazilian metropolitan food-purchase emissions from da Silva et al. [45]. | Induced food emissions | Use diet-specific data and consider PAS healthy-eating actions. |
| Academia da Saude | Food compensation | 0%, 50%, 100% of 200 kcal/visit | Sensitivity analysis using Compendium-informed energy-expenditure screening and Brazilian diet factor [39,45]. | Induced emissions | Measure or model probabilistically. |

## S2.3 Climate-cost implications for the Eight Investments

The Eight Investments are evidence-based physical activity domains, not carbon categories. Their climate cost depends on delivery system, counterfactual, induced behavior, and adaptation/equity safeguards [1,4].

**Supplementary Table S2c. Climate-cost implications for the Eight Investments That Work for Physical Activity.**

| **Eight Investment domain** | **Climate-cost profile** | **Design implication for physical activity promotion** |
| --- | --- | --- |
| Whole-of-school programs | Low to moderate; often favorable if activity occurs during school time and school travel shifts from car to walking, cycling, wheeling, or bus [4]. | Measure school-run mode and distance; use existing spaces; avoid car-dependent after-school delivery; include heat, shade, hydration, disability access, and air-quality safeguards. |
| Active transport | Often climate-beneficial when active trips replace car trips or reduce car ownership/use; infrastructure has embodied carbon [11-14,27-29]. | Measure car-km avoided and not only active minutes; report carbon payback; pair infrastructure with traffic calming, safety, transit, and equity safeguards. |
| Active urban design | Low to moderate gross cost; benefits depend on compactness, local access, shade, reduced vehicle dependence, maintenance, and embodied materials [1,3,4,21-24]. | Count construction and maintenance; avoid displacement; design for heat adaptation, disability access, safety, and maintenance under future climate conditions. |
| Healthcare | Low to moderate; can increase emissions if referrals require travel to distant facilities. Avoided healthcare emissions are potentially relevant but should be treated cautiously [18]. | Prioritize brief advice, local social prescribing, home-based and community options; model avoided healthcare emissions only as secondary sensitivity unless measured. |
| Public education | Low direct footprint, but weak climate effect if not connected to environmental or policy change [1,3,4]. | Use campaigns to build support for active transport, school streets, public spaces, and low-carbon recreation rather than relying on information alone. |
| Sport and recreation | Variable to high; travel, accommodation, facilities, equipment, events, and procurement can dominate emissions [15-17,38]. | Localize schedules; reduce air travel; survey participant/spectator travel; use efficient facilities; avoid unnecessary merchandise; protect outdoor sport from heat, smoke, flooding, and unsafe air quality. |
| Workplaces | Usually low direct footprint; climate benefit depends on commute mode shift and whether activity uses existing spaces [4,12-14]. | Support active commuting, walking meetings, stair use, flexible schedules, and local movement opportunities; report commute-km shifted; avoid interventions that induce extra car travel to gyms or events. |
| Community-wide programs | Can be high-value if they combine active transport, public space, schools, healthcare, and local programming; gross cost depends on infrastructure and operations [1,4,40-43,49]. | Use PA-CARBON at the portfolio level; report distribution of benefits and burdens; integrate with climate adaptation, primary care, and local health-equity priorities. |

## S2.4 Domain-specific interpretation

For active transport and active urban design, the most important recommendation is to measure and maximize the substitution of motorized travel. Protected networks, traffic calming, school streets, connected sidewalks, and compact urban form are most effective when they reduce vehicle-km, not merely when they add recreational walking. Evaluation should combine physical activity outcomes with car-km avoided, vehicle ownership and use, parking demand, public-transport integration, safety, and carbon payback.

For community programs such as Academia da Saúde, the design priority is local, inclusive, and climate-resilient delivery. Polos and similar community spaces should be located within walking distance of target populations, integrated with primary care and active transportation, built with durable low-carbon materials, shaded and ventilated for hotter conditions, and monitored for energy, water, maintenance, and travel mode. These programs should not be judged solely by carbon efficiency, because equity, access, and social participation are central public-health goals; however, their footprint can often be reduced without weakening those goals.

For facilities, sports, and recreation, the first climate lever is travel demand, followed by energy, procurement, and waste. A highly efficient gym or stadium can still have a large footprint if most users drive or fly. Local scheduling, public transportation, carpooling, no-fly norms where feasible, reduced merchandise, reusable systems, efficient buildings, electrified heating, renewable electricity, and transparent travel surveys should become routine.

For healthcare, schools, workplaces, and public education, the most promising strategies build on existing routines and settings. Brief advice, local exercise referrals, home-based support, walking meetings, active breaks, stair prompts, active school travel, and school-day movement can increase activity with minimal additional infrastructure or travel. The climate benefit is stronger when these strategies also shift commuting or school-drop-off travel from cars to active modes or transit.

## S2.5 Notes on evidence strength

Active transport has the highest confidence for mitigation when car travel is replaced, because vehicle-km avoided can be measured directly and supported by active-travel evidence and IPCC transport mitigation logic.

Sport and recreation have high hotspot confidence because multiple studies show that Scope 3 travel can dominate event and participation footprints.

Community, school, workplace, health-care, and public education programs have stronger physical-activity evidence than carbon evidence. PA-CARBON therefore emphasizes transparent data collection rather than assuming a climate benefit.

Across all eight investments, food compensation, rebound travel, and equity/adaptation effects should be reported as sensitivity analyses or qualitative safeguards unless measured directly.

## References

*Reference numbers correspond to the main manuscript reference list.*

1. Hinckson E, Reis R, Romanello M, et al. Benefits of physical activity initiatives for climate change mitigation and adaptation. Nature Health. 2026;1(3):300-315.

3. Capdevila M, Villalonga-Olives E, Cunha I, Mena G, Lee E, Tremblay M. Physical activity, climate change and health - a conceptual model and scoping review. Lancet Planet Health. 2024;8:e574-e584.

4. Milton K, Cavill N, Chalkley A, et al. Eight Investments That Work for Physical Activity. J Phys Act Health. 2021;18(6):625-630.

11. Aldred R, Goodman A, Woodcock J. Impacts of active travel interventions on travel behavior and health: Results from a five-year longitudinal travel survey in Outer London. Journal of Transport & Health. 2024;35:101771.

12. Brand C, Dons E, Anaya-Boig E, et al. The climate change mitigation effects of daily active travel in cities. Transportation Research Part D: Transport and Environment. 2021;93:102764.

13. Ding D, Luo M, Infante MFP, et al. The co-benefits of active travel interventions beyond physical activity: a systematic review. Lancet Planet Health. 2024;8(10):e790-e803.

14. Roaf E, Larrington-Spencer H, Lawlor ER. Interventions to increase active travel: A systematic review. Journal of Transport & Health. 2024;38:101860.

15. McCullough BP, Collins A, Roberts J, Villalobos S. Sport Events and Emissions Reporting: An Analysis of the Council for Responsible Sport Standard in Running Events. Sustainability. 2023;15(19):14375.

16. Wicker P. The carbon footprint of active sport participants. Sport Management Review. 2021;22(4):513-526.

17. Wilby RL, Orr M, Depledge D, et al. The impacts of sport emissions on climate: Measurement, mitigation, and making a difference. Annals of the New York Academy of Sciences. 2023;1519(1):20-33.

18. Lenzen M, Malik A, Li M, et al. The environmental footprint of health care: a global assessment. Lancet Planet Health. 2020;4(7):e271-e279.

19. Mizdrak A, Cobiac LJ, Cleghorn CL, Woodward A, Blakely T. Fuelling walking and cycling: human-powered locomotion is associated with non-negligible greenhouse gas emissions. Sci Rep. 2020;10(1):9196.

21. Intergovernmental Panel on Climate Change. Climate Change 2022: Mitigation of Climate Change. Contribution of Working Group III to the Sixth Assessment Report. Cambridge: Cambridge University Press; 2022.

22. International Organization for Standardization. ISO 14040:2006 Environmental management - Life cycle assessment - Principles and framework. Geneva: ISO; 2006.

23. International Organization for Standardization. ISO 14044:2006 Environmental management - Life cycle assessment - Requirements and guidelines. Geneva: ISO; 2006.

24. International Organization for Standardization. ISO 14067:2018 Greenhouse gases - Carbon footprint of products - Requirements and guidelines for quantification. Geneva: ISO; 2018.

25. World Resources Institute, World Business Council for Sustainable Development. The GHG Protocol for Project Accounting. Washington, DC and Geneva: WRI/WBCSD; 2005.

26. World Resources Institute, World Business Council for Sustainable Development. Global Warming Potential Values. Washington, DC: GHG Protocol; 2024.

27. Kahlmeier S, Cavill N, Thondoo M, et al. The Health Economic Assessment Tool (HEAT) for walking and cycling - experiences from 10 years of application of a health impact assessment tool in policy and practice. Front Sports Act Living. 2023;5:1146761.

28. World Health Organization Regional Office for Europe. Health Economic Assessment Tool (HEAT) for walking and cycling. 2026. https://www.who.int/europe/tools-and-toolkits/health-economic-assessment-tool-for-walking-and-cycling.

29. California Department of Transportation. Evaluating the greenhouse gas reduction benefits of bicycle facilities. Sacramento, CA: California Department of Transportation; 2018.

38. Herold DM, Breitbarth T, Hergesell A, Schulenkorf N. Sport events and the environment: Assessing the carbon footprint of spectators' modal choices at professional football games in Austria. J Clean Prod. 2024;452:142259.

39. Ainsworth BE, Haskell WL, Herrmann SD, et al. 2011 Compendium of Physical Activities: a second update of codes and MET values. Med Sci Sports Exerc. 2011;43(8):1575-1581.

40. Faria TMTR, Brenner S, Deckert A, Florindo AA, Mielke GI. Health Academy Program and physical activity levels in Brazilian state capitals. Revista Brasileira de Atividade Física & Saúde. 2020;25:1-8.

41. Florindo AA, Nakamura PM, Farias Junior JC, et al. Promoção da atividade física e da alimentação saudável e a saúde da família em municípios com academia da saúde. Rev Bras Educ Fís Esporte. 2016;30(4):913-924.

42. Silva DAS, de Lima TR, Goncalves L. Academia da Saude program: mapping evidence from the largest health promotion community program in Brazil. Front Public Health. 2023;11:1227899.

43. Simoes EJ, Hallal PC, Siqueira FV, et al. Effectiveness of a scaled up physical activity intervention in Brazil: A natural experiment. Prev Med. 2017;103S:S66-S72.

44. Belizario-Silva F, Costa Reis D, Carvalho M, Leopoldo e Silva França R, John VM. Material intensity and embodied CO2 benchmark for reinforced concrete structures in Brazil. Journal of Building Engineering. 2024;82:108234.

45. da Silva JT, Garzillo JMF, Rauber F, et al. Greenhouse gas emissions, water footprint, and ecological footprint of food purchases according to their degree of processing in Brazilian metropolitan areas: a time-series study from 1987 to 2018. Lancet Planet Health. 2021;5(11):e775-e785.

46. Department for Transport. London Mini-Hollands. 2023. https://www.gov.uk/government/case-studies/london-mini-hollands.

47. Aldred R, Woodcock J, Goodman A. Major investment in active travel in Outer London: Impacts on travel behaviour, physical activity, and health. Journal of Transport & Health. 2021;20:100958.

48. Goodman A, Urban S, Aldred R. The Impact of Low Traffic Neighbourhoods and Other Active Travel Interventions on Vehicle Ownership: Findings from the Outer London Mini-Holland Programme. Findings. 2020.

49. Florindo AA, Reis RS, Farias Junior JC, Siqueira FV, Nakamura PM, Hallal PC. Description of health promotion actions in Brazilian cities that received funds to develop Academia da Saúde program. Brazilian Journal of Kinanthropometry and Human Performance. 2016;18(4):483-492.

**Additional supplement-only references cited in this file**

A1. Department for Energy Security and Net Zero. Greenhouse gas reporting: conversion factors 2025. London: UK Government; 2025. https://www.gov.uk/government/publications/greenhouse-gas-reporting-conversion-factors-2025.

A2. Ministério da Saúde, Brasil. Programa Academia da Saúde. Brasília: Ministério da Saúde. https://www.gov.br/saude/pt-br/composicao/saps/academia-da-saude.

A3. Ministério da Saúde, Brasil. Construção de polos do Programa Academia da Saúde. Brasília: Ministério da Saúde. https://www.gov.br/saude/pt-br/composicao/saps/academia-da-saude/construcao-de-polos.

A4. Ministério da Saúde, Brasil. Ministério da Saúde amplia os atendimentos contra a obesidade na atenção básica em três anos. Brasília: Ministério da Saúde; 2026.

A5. Empresa de Pesquisa Energética. Balanço Energético Nacional 2025: Ano base 2024 - Síntese. Rio de Janeiro: EPE; 2025.

A6. International Council on Clean Transportation. Avaliação do ciclo de vida das emissões de gases de efeito estufa de automóveis no Brasil. Washington, DC: ICCT; 2023.

# Supplementary File 3. PA-CARBON six-step reporting table for the three case studies

**Supplementary Table S3. PA-CARBON six-step reporting table for the three case studies.**

| **PA-CARBON reporting step** | **Case 1: Hypothetical active-commute program** | **Case 2: London Mini-Hollands/LTN-style estimate** | **Case 3: Brazil Academia da Saúde** |
| --- | --- | --- | --- |
| 1. Strategy & context Classify the strategy, implementation setting, reach, equity and adaptation context. | Investment domain: workplace/active-transport promotion. Illustrative program for 1,000 workers, with 250 regular participants. Strategy includes route planning, active-commute coaching, employer challenges, bike parking, tactical street changes, reflective gear, and a travel-feedback app. Equity/adaptation considerations: safe routes, affordability, disability access, schedule flexibility, and protection from heat/air pollution should be assessed. Assumption-driven case; not a real implementation. Supports PA-CARBON demonstration logic using project accounting and active-travel evidence [12-14,25,29,A1]. | Investment domains: active transport and active urban design. Real program in outer London boroughs (Enfield, Kingston, Waltham Forest), including cycling infrastructure, traffic calming, public-realm redesign, crossings, cycle hubs, trees/planting, and behavior-change support [46]. Equity/adaptation considerations: outer-borough accessibility, road safety, distribution of street-space benefits, walking/cycling access, and public-space resilience. Evidence comes from longitudinal/natural-experiment evaluation and vehicle-ownership analysis [11,47,48]. | Investment domains: community-wide program, healthcare/primary care, sport and recreation/body practices, public education and healthy eating. Real Brazilian public program delivered through local polos integrated with primary health care [40-43,49]. Equity/adaptation considerations: free public access, Global South implementation, older adults/low-income communities, walking access, heat/shade, disability inclusion, and primary-care integration. Official program and construction data support the screening boundary [40-43,49]. |
| 2. Counterfactual Define what would happen without the strategy and what behavior is attributable to the intervention. | Illustrative counterfactual: 250 participants would continue commuting by car. Assumed attributable change: two 8-km car round trips/week replaced by walking or cycling for 40 weeks/year. Avoided distance = 160,000 vehicle-km/year. This value should be clearly flagged in the main text as an illustrative assumption, not an observed outcome. | Counterfactual: baseline travel and vehicle ownership/use in comparison or lower-exposure areas. Screening analysis uses the reported reduction of approximately 23 fewer cars/vans per 1,000 adults in LTN areas as a proxy for avoided driving [48]. Vehicle-km avoided are not directly measured in the screening estimate; low/central/high assumptions are 4,000/6,000/8,000 km/year per removed vehicle. | Conservative counterfactual: no automatic avoided-emissions credit because participants may otherwise be inactive at home, use a private gym, use another community setting, or travel to clinical services. Sensitivity counterfactual: 10% of visits replace an 8-km round-trip car journey to a private gym, clinic, or alternative exercise venue. This substitution should be measured locally before claiming avoided emissions. |
| 3. Gross inventory Inventory gross implementation emissions across travel, facilities, infrastructure, equipment, food, energy, waste, water, digital systems, accommodation and operations. | Gross implementation estimate: 8.6 tCO2e/year excluding food. Components: 1.6 tCO2e/year for staff/program operations, 4.0 tCO2e/year for equipment/materials, and 3.0 tCO2e/year for annualized tactical infrastructure. These values are screening placeholders and should be replaced with procurement records, travel data, and site-specific infrastructure data in a real evaluation. | Gross implementation estimate: high-cost LTN-style infrastructure = 3,603 tCO2e upfront per 100,000 adults, annualized over 20 years to 180 tCO2e/year. This is based on a screening spend proxy because project bills of quantities were unavailable. Formal studies should use material-level LCA for asphalt, concrete, kerbs, traffic filters, lighting, signage, planting, maintenance, and contractor energy [21-26,29]. | Gross per-polo estimate: 4.75 tCO2e/year excluding food; 6.62 tCO2e/year with 50% food compensation; 8.49 tCO2e/year with full food compensation. Components: annualized construction 2.63, electricity 0.12, equipment/maintenance 0.70, staff travel 0.68, participant travel 0.62 tCO2e/year. Inputs use official PAS area/modality data, Brazil electricity data, Brazil vehicle factors, diet-emissions data, and embodied-carbon benchmarks [40-45,49,A2-A6]. |
| 4. Induced & avoided emissions Estimate induced emissions and avoided emissions separately. | Induced emissions: food-compensation sensitivity based on walking/cycling food-emissions evidence [19]. Low/central/high food scenarios = 6.1/17.3/30.1 tCO2e/year. Avoided emissions: 160,000 avoided vehicle-km/year x 0.211 kgCO2e/km = 33.8 tCO2e/year [A1]. Net scenarios: -25.2 tCO2e/year excluding food; -19.1 low food; -7.9 central food; +4.9 high/full food. | Induced emissions: food-compensation sensitivity for additional active travel. No/low/central/high food scenarios = 0/1,030/2,985/approximately 4,940-5,188 tCO2e/year per 100,000 adults [19]. Avoided emissions: 1,943/2,915/3,887 tCO2e/year under 4,000/6,000/8,000 avoided km/year per removed vehicle. Net central estimate: -2,735 tCO2e/year excluding food; +250 tCO2e/year with central food sensitivity. | Induced emissions: food-compensation sensitivity using 200 kcal/visit and Brazilian diet GHG intensity [45]. 50% compensation = +1.87 tCO2e/year; full compensation = +3.73 tCO2e/year. Avoided emissions: 0 tCO2e/year in the conservative estimate; +1.24 tCO2e/year avoided if 10% of visits replace 8-km car round trips [A6]. Net with 10% substitution = 3.51-7.25 tCO2e/year depending on food scenario. |
| 5. Functional units Report climate cost in physical-activity and transport units. | Activity output: approximately 1,152,000 active minutes/year. Gross implementation intensity excluding food = 7.5 gCO2e/active minute. Gross intensity with central food = 22.5 gCO2e/active minute. Net intensity with central food = -6.9 gCO2e/active minute. Recommended additional units: kgCO2e/participant-year and kgCO2e/car-km avoided. | Activity output: 41 additional active-travel minutes/week/adult; 213.2 million active minutes/year per 100,000 adults. Net intensity excluding food under central avoided-driving case = -12.8 gCO2e/active minute. Net intensity with central food = +1.2 gCO2e/active minute. Carbon payback for LTN-style infrastructure = approximately 0.3-1.2 years if avoided vehicle-km occur. | Activity output: 10,000 visits/year x 45 minutes/visit = 450,000 active minutes/year per polo. Gross intensity = 0.48 kgCO2e/visit excluding food; 0.66 kgCO2e/visit with 50% food; 0.85 kgCO2e/visit with full food. Per active minute = 10.6/14.7/18.9 gCO2e. National network screening estimate for 1,779 polos = 8.46-15.10 ktCO2e/year depending on food scenario [A4]. |
| 6. Redesign & report Use results to improve design, state uncertainty, equity/adaptation safeguards, and reporting needs. | Redesign priorities: verify actual mode substitution; prioritize safe routes, bike parking, walking/cycling access, and low-material implementation; avoid consumption-heavy incentives; integrate plant-forward healthy-eating messages where relevant; collect participant travel mode/distance and retention. Report assumptions transparently as illustrative unless measured. | Redesign priorities: pair active-travel infrastructure with traffic calming, safety, access, and equity safeguards; measure vehicle-km, car ownership/use, active minutes, and material quantities; report infrastructure carbon payback; include heat, shade, drainage, and air-quality adaptation. Avoid overclaiming mitigation if active travel increases without reduced driving. | Redesign priorities: site polos within walking distance of target populations; use durable low-carbon materials; provide shade, ventilation, hydration, and accessible design; meter electricity/water; track staff/participant travel; monitor equipment replacement; measure whether PAS replaces private gym/clinical trips; report gross results separately from any modeled avoided emissions. |

## References

*Reference numbers correspond to the main manuscript reference list.*

11. Aldred R, Goodman A, Woodcock J. Impacts of active travel interventions on travel behaviour and health: Results from a five-year longitudinal travel survey in Outer London. Journal of Transport & Health. 2024;35:101771.

12. Brand C, Dons E, Anaya-Boig E, et al. The climate change mitigation effects of daily active travel in cities. Transportation Research Part D: Transport and Environment. 2021;93:102764.

13. Ding D, Luo M, Infante MFP, et al. The co-benefits of active travel interventions beyond physical activity: a systematic review. Lancet Planet Health. 2024;8(10):e790-e803.

14. Roaf E, Larrington-Spencer H, Lawlor ER. Interventions to increase active travel: A systematic review. Journal of Transport & Health. 2024;38:101860.

19. Mizdrak A, Cobiac LJ, Cleghorn CL, Woodward A, Blakely T. Fuelling walking and cycling: human powered locomotion is associated with non-negligible greenhouse gas emissions. Sci Rep. 2020;10(1):9196.

21. Intergovernmental Panel on Climate Change. Climate Change 2022: Mitigation of Climate Change. Contribution of Working Group III to the Sixth Assessment Report. Cambridge: Cambridge University Press; 2022.

22. International Organization for Standardization. ISO 14040:2006 Environmental management - Life cycle assessment - Principles and framework. Geneva: ISO; 2006.

23. International Organization for Standardization. ISO 14044:2006 Environmental management - Life cycle assessment - Requirements and guidelines. Geneva: ISO; 2006.

24. International Organization for Standardization. ISO 14067:2018 Greenhouse gases - Carbon footprint of products - Requirements and guidelines for quantification. Geneva: ISO; 2018.

25. World Resources Institute, World Business Council for Sustainable Development. The GHG Protocol for Project Accounting. Washington, DC and Geneva: WRI/WBCSD; 2005.

26. World Resources Institute, World Business Council for Sustainable Development. Global Warming Potential Values. Washington, DC: GHG Protocol; 2024.

29. California Department of Transportation. Evaluating the greenhouse gas reduction benefits of bicycle facilities. Sacramento, CA: California Department of Transportation; 2018.

40. Faria TMTR, Brenner S, Deckert A, Florindo AA, Mielke GI. Health Academy Program and physical activity levels in Brazilian state capitals. Revista Brasileira de Atividade Física & Saúde. 2020;25:1-8.

41. Florindo AA, Nakamura PM, Farias Junior JC, et al. Promoção da atividade física e da alimentação saudável e a saúde da família em municípios com academia da saúde. Rev Bras Educ Fís Esporte. 2016;30(4):913-924.

42. Silva DAS, de Lima TR, Goncalves L. Academia da Saude program: mapping evidence from the largest health promotion community program in Brazil. Front Public Health. 2023;11:1227899.

43. Simoes EJ, Hallal PC, Siqueira FV, et al. Effectiveness of a scaled up physical activity intervention in Brazil: A natural experiment. Prev Med. 2017;103S:S66-S72.

44. Belizario-Silva F, Costa Reis D, Carvalho M, Leopoldo e Silva França R, John VM. Material intensity and embodied CO2 benchmark for reinforced concrete structures in Brazil. Journal of Building Engineering. 2024;82:108234.

45. da Silva JT, Garzillo JMF, Rauber F, et al. Greenhouse gas emissions, water footprint, and ecological footprint of food purchases according to their degree of processing in Brazilian metropolitan areas: a time-series study from 1987 to 2018. Lancet Planet Health. 2021;5(11):e775-e785.

46. Department for Transport. London Mini-Hollands. 2023. https://www.gov.uk/government/case-studies/london-mini-hollands.

47. Aldred R, Woodcock J, Goodman A. Major investment in active travel in Outer London: Impacts on travel behaviour, physical activity, and health. Journal of Transport & Health. 2021;20:100958.

48. Goodman A, Urban S, Aldred R. The Impact of Low Traffic Neighbourhoods and Other Active Travel Interventions on Vehicle Ownership: Findings from the Outer London Mini-Holland Programme. Findings. 2020.

49. Florindo AA, Reis RS, Farias Junior JC, Siqueira FV, Nakamura PM, Hallal PC. Description of health promotion actions in Brazilian cities that received funds to develop Academia da Saúde program. Brazilian Journal of Kinanthropometry and Human Performance. 2016;18(4):483-492.

Additional supplement-only references cited in this file

A1. Department for Energy Security and Net Zero. Greenhouse gas reporting: conversion factors 2025. London: UK Government; 2025. https://www.gov.uk/government/publications/greenhouse-gas-reporting-conversion-factors-2025.

A2. Ministério da Saúde, Brasil. Programa Academia da Saúde. Brasília: Ministério da Saúde. https://www.gov.br/saude/pt-br/composicao/saps/academia-da-saude.

A3. Ministério da Saúde, Brasil. Construção de polos do Programa Academia da Saúde. Brasília: Ministério da Saúde. https://www.gov.br/saude/pt-br/composicao/saps/academia-da-saude/construcao-de-polos.

A4. Ministério da Saúde, Brasil. Ministério da Saúde amplia os atendimentos contra a obesidade na atenção básica em três anos. Brasília: Ministério da Saúde; 2026.

A5. Empresa de Pesquisa Energética. Balanço Energético Nacional 2025: Ano base 2024 - Síntese. Rio de Janeiro: EPE; 2025.

A6. International Council on Clean Transportation. Avaliação do ciclo de vida das emissões de gases de efeito estufa de automóveis no Brasil. Washington, DC: ICCT; 2023.

# Supplementary File 4. PA-CARBON protocol, equations, data hierarchy, and full case-study calculations

## S4.1 PA-CARBON equations

Net CO2e = gross implementation emissions + induced emissions - avoided emissions [21-26].

E_travel = sum(distance by mode x trips x emission factor by mode).

E_facility = sum(kWh x electricity factor) + sum(fuel x fuel factor).

E_materials = sum(material mass, spend or area x material emission factor) [22-24].

E_food = incremental kcal x diet-specific kgCO2e per kcal, or active km x food-energy scenario [19,39,45].

E_annualized infrastructure = (construction CO2e + major maintenance CO2e + end-of-life CO2e) / expected service life [22-24,29].

Carbon payback period = upfront embodied CO2e / annual avoided CO2e net of annual added emissions [25,29].

## S4.2 Methodological specification and data hierarchy

### S4.2.1 Framework-development logic

PA-CARBON was developed as a standards-compatible methodological framework rather than as a new greenhouse-gas standard. The development process followed a theory-informed adaptation logic consistent with best-fit framework synthesis, methodological framework development, complex-intervention guidance, intervention reporting, and implementation-evaluation frameworks [31-35].

The parent frameworks were selected for complementary functions: the Eight Investments and the PACC model defined the intervention universe and mitigation/adaptation pathways [1,4]; GHG Protocol project accounting defined baseline, project, induced, and avoided emissions [25,37]; ISO life-cycle standards defined boundaries, functional units, allocation, and data-quality expectations for materials, facilities, equipment, food, and infrastructure [22-24]; WHO HEAT and active-travel LCA tools informed walking/cycling and carbon-payback logic [27-29]; and sport/event footprinting evidence ensured that participant and spectator travel, accommodation, procurement, and logistics were included [15-17,38].

### S4.2.2 Development stages used to construct PA-CARBON

Stage 1 - Problem definition: Identify the practical evaluation gap: the absence of a common method for estimating climate cost across physical activity strategies.

Stage 2 - Parent framework identification: Select established standards, models, and tools that cover physical activity promotion, climate mitigation/adaptation, GHG accounting, life-cycle assessment, active travel, sport/event footprinting, and implementation reporting.

Stage 3 - Construct extraction: Extract candidate constructs including intervention domain, reach, equity context, counterfactual, system boundary, Scope 1-3 emissions, functional unit, induced emissions, avoided emissions, uncertainty, and carbon payback.

Stage 4 - Construct mapping: Map extracted constructs onto the physical activity intervention pathway from strategy selection to delivery, use, outcome measurement, carbon reporting, and redesign.

Stage 5 - Gap resolution: Define adaptation rules for components not handled consistently by parent tools, including food compensation, participant travel, facility substitution, exhaled CO2, offsets, infrastructure annualization, and equity/adaptation safeguards [19,20,22-26].

Stage 6 - Illustrative stress testing: Apply the resulting framework to maximum-contrast case studies to examine whether the same accounting logic can be used for active commuting, active-travel infrastructure, and community/primary-care physical activity promotion [11,40-49].

### S4.2.3 Data hierarchy and analytic status

PA-CARBON should be applied as a project-level, life-cycle-informed GHG assessment. The recommended workflow is to define the strategy and setting, specify the counterfactual, inventory gross emissions, estimate induced and avoided emissions, report outcome-linked functional units, and redesign the strategy based on uncertainty, equity, and adaptation safeguards [21-26].

The method distinguishes attributional and consequential components. Gross implementation emissions are attributional and include resources used to deliver and use the intervention. Induced and avoided emissions are consequential because they depend on changes caused by the intervention relative to the counterfactual [25].

Data quality should be reported using four tiers: Tier 1, directly measured data such as utility bills, GPS/travel diaries, attendance records, bills of quantities, and procurement records; Tier 2, administrative data such as registration postcodes, facility logs, budgets, and mode-share surveys; Tier 3, model-based estimates such as transport models, national travel statistics, emission factor databases, activity energy expenditure estimates, and diet-emission factors; and Tier 4, screening proxies such as spend-based, area-based, or benchmark estimates [21-29,39,44,45].

Uncertainty should be reported using low, central, and high scenarios or probabilistic methods. Priority sensitivity variables include car-km avoided, travel distance, car occupancy, mode substitution, facility energy, infrastructure lifetime, attendance, retention, equipment life, food compensation, and emission factors [12-14,19].

## S4.3 Minimum reporting protocol

**Supplementary Table S4. Minimum PA-CARBON reporting protocol.**

| **Element** | **Requirement** |
| --- | --- |
| Boundary | Planning, procurement, implementation, use, maintenance and end of life where material. |
| Counterfactual | State what would happen without the strategy: no activity, car travel, private gym, another facility, transit, no trip or alternative leisure. |
| Gross emissions | Report implementation emissions before subtracting any avoided emissions. |
| Induced emissions | Report new travel, food, energy or consumption caused by the strategy. |
| Avoided emissions | Report separately as project effects, not offsets. |
| Functional units | Report kgCO2e per participant, visit, active minute, MET-hour, car-km avoided and carbon payback where appropriate. |
| Uncertainty | Use low, central and high scenarios or probabilistic analysis. |
| Equity/adaptation | Report heat, air quality, disability access, affordability, safety, displacement risk and climate resilience. |

## S4.4 Expanded case-study calculations

### S4.4.1 Hypothetical active-commute program

Avoided car-km = 250 participants x 2 round trips/week x 40 weeks x 8 km/round trip = 160,000 vehicle-km/year. This is an illustrative assumption rather than an observed program outcome [12-14,25,29].

Avoided emissions = 160,000 x 0.211 kgCO2e/km = 33,760 kgCO2e/year = 33.8 tCO2e/year [A1].

Gross implementation emissions = 1.6 t operations + 4.0 t equipment/materials + 3.0 t annualized tactical infrastructure = 8.6 tCO2e/year excluding food.

Food sensitivity uses 64,000 km of walking and 96,000 km of cycling. Low = 6.1 tCO2e/year; central = 17.3 tCO2e/year; high/full = 30.1 tCO2e/year [19].

Active minutes = (96,000/15 + 64,000/5) hours x 60 = 1,152,000 active minutes/year [39].

### S4.4.2 London Mini-Hollands LTN-style estimate

Active minutes per 100,000 adults = 41 minutes/week x 52 weeks x 100,000 = 213,200,000 active minutes/year [11,47].

Reduced vehicles = 23 fewer cars/vans per 1,000 adults x 100 = 2,300 fewer vehicles per 100,000 adults [48].

Central avoided emissions = 2,300 vehicles x 6,000 km/year x 0.211 kgCO2e/km = 2,911,800 kgCO2e/year = 2,912 tCO2e/year; rounded manuscript value = 2,915 tCO2e/year from spreadsheet precision [46-48,A1].

Infrastructure screening = 100,000 adults x GBP112/person x 0.322 kgCO2e/GBP = 3,606 tCO2e upfront; annualized over 20 years = 180 tCO2e/year [22-24,29].

Food sensitivity assumes 80% of the time is spent walking and 20% cycling. Central food = 14.2 million walking-km x 0.15 + 10.7 million cycling-km x 0.08 = approximately 2,985 tCO2e/year [19].

### S4.4.3 Brazil Programa Academia da Saude

Construction = 263.2 m2 x 200 kgCO2e/m2 = 52.64 tCO2e upfront; annualized over 20 years = 2.63 tCO2e/year [40-44,49,A2,A3].

Electricity = 2,000 kWh/year x 0.0599 kgCO2e/kWh = 0.12 tCO2e/year [A5].

Staff travel = 20 km/day x 220 days/year x 0.155 kgCO2e/km = 0.68 tCO2e/year [A6].

Participant travel = 10,000 visits x 10% car share x 4 km/round trip x 0.155 kgCO2e/km = 0.62 tCO2e/year [A6].

Gross excluding food = 2.63 + 0.12 + 0.70 + 0.68 + 0.62 = 4.75 tCO2e/year.

Food sensitivity = 200 kcal/visit x 10,000 visits = 2,000,000 kcal/year. Full compensation = 2,000 x 1.866 kgCO2e/1,000 kcal = 3.73 tCO2e/year; 50% compensation = 1.87 tCO2e/year [45].

National network = 1,779 polos x 4.75 = 8.46 ktCO2e/year excluding food; 1,779 x 6.62 = 11.78 ktCO2e/year with 50% food compensation; 1,779 x 8.49 = 15.10 ktCO2e/year with full food compensation [40-43,49,A4].

## References

*Reference numbers correspond to the main manuscript reference list.*

1. Hinckson E, Reis R, Romanello M, et al. Benefit of physical activity initiatives for climate change mitigation and adaptation. Nature Health. 2026;1(3):300-315.

4. Milton K, Cavill N, Chalkley A, et al. Eight Investments That Work for Physical Activity. J Phys Act Health. 2021;18(6):625-630.

11. Aldred R, Goodman A, Woodcock J. Impacts of active travel interventions on travel behaviour and health: Results from a five-year longitudinal travel survey in Outer London. Journal of Transport & Health. 2024;35:101771.

12. Brand C, Dons E, Anaya-Boig E, et al. The climate change mitigation effects of daily active travel in cities. Transportation Research Part D: Transport and Environment. 2021;93:102764.

13. Ding D, Luo M, Infante MFP, et al. The co-benefits of active travel interventions beyond physical activity: a systematic review. Lancet Planet Health. 2024;8(10):e790-e803.

14. Roaf E, Larrington-Spencer H, Lawlor ER. Interventions to increase active travel: A systematic review. Journal of Transport & Health. 2024;38:101860.

15. McCullough BP, Collins A, Roberts J, Villalobos S. Sport Events and Emissions Reporting: An Analysis of the Council for Responsible Sport Standard in Running Events. Sustainability. 2023;15(19):14375.

16. Wicker P. The carbon footprint of active sport participants. Sport Management Review. 2021;22(4):513-526.

17. Wilby RL, Orr M, Depledge D, et al. The impacts of sport emissions on climate: Measurement, mitigation, and making a difference. Annals of the New York Academy of Sciences. 2023;1519(1):20-33.

19. Mizdrak A, Cobiac LJ, Cleghorn CL, Woodward A, Blakely T. Fuelling walking and cycling: human powered locomotion is associated with non-negligible greenhouse gas emissions. Sci Rep. 2020;10(1):9196.

20. Ask MIT Climate. Does the carbon dioxide humans breathe out contribute to climate change? 2026. https://climate.mit.edu/ask-mit/does-carbon-dioxide-humans-breathe-out-contribute-climate-change.

21. Intergovernmental Panel on Climate Change. Climate Change 2022: Mitigation of Climate Change. Contribution of Working Group III to the Sixth Assessment Report. Cambridge: Cambridge University Press; 2022.

22. International Organization for Standardization. ISO 14040:2006 Environmental management - Life cycle assessment - Principles and framework. Geneva: ISO; 2006.

23. International Organization for Standardization. ISO 14044:2006 Environmental management - Life cycle assessment - Requirements and guidelines. Geneva: ISO; 2006.

24. International Organization for Standardization. ISO 14067:2018 Greenhouse gases - Carbon footprint of products - Requirements and guidelines for quantification. Geneva: ISO; 2018.

25. World Resources Institute, World Business Council for Sustainable Development. The GHG Protocol for Project Accounting. Washington, DC and Geneva: WRI/WBCSD; 2005.

26. World Resources Institute, World Business Council for Sustainable Development. Global Warming Potential Values. Washington, DC: GHG Protocol; 2024.

27. Kahlmeier S, Cavill N, Thondoo M, et al. The Health Economic Assessment Tool (HEAT) for walking and cycling - experiences from 10 years of application of a health impact assessment tool in policy and practice. Front Sports Act Living. 2023;5:1146761.

28. World Health Organization Regional Office for Europe. Health Economic Assessment Tool (HEAT) for walking and cycling. 2026. https://www.who.int/europe/tools-and-toolkits/health-economic-assessment-tool-for-walking-and-cycling.

29. California Department of Transportation. Evaluating the greenhouse gas reduction benefits of bicycle facilities. Sacramento, CA: California Department of Transportation; 2018.

31. Carroll C, Booth A, Leaviss J, Rick J. Best fit framework synthesis: refining the method. BMC Med Res Methodol. 2013;13:37.

32. Skivington K, Matthews L, Simpson SA, et al. A new framework for developing and evaluating complex interventions: update of Medical Research Council guidance. BMJ. 2021;374:n2061.

33. McMeekin N, Wu O, Germeni E, Briggs A. How methodological frameworks are being developed: evidence from a scoping review. BMC Med Res Methodol. 2020;20(1):173.

34. Glasgow RE, Vogt TM, Boles SM. Evaluating the public health impact of health promotion interventions: the RE-AIM framework. Am J Public Health. 1999;89(9):1322-1327.

35. Hoffmann TC, Glasziou PP, Boutron I, et al. Better reporting of interventions: the TIDieR template for intervention description and replication (checklist and guide). BMJ. 2014;348:g1687.

37. World Resources Institute, World Business Council for Sustainable Development. The Greenhouse Gas Protocol: A Corporate Accounting and Reporting Standard. Revised edition. Washington, DC and Geneva: WRI/WBCSD; 2004.

38. Herold DM, Breitbarth T, Hergesell A, Schulenkorf N. Sport events and the environment: Assessing the carbon footprint of spectators' modal choices at professional football games in Austria. J Clean Prod. 2024;452:142259.

39. Ainsworth BE, Haskell WL, Herrmann SD, et al. 2011 Compendium of Physical Activities: a second update of codes and MET values. Med Sci Sports Exerc. 2011;43(8):1575-1581.

40. Faria TMTR, Brenner S, Deckert A, Florindo AA, Mielke GI. Health Academy Program and physical activity levels in Brazilian state capitals. Revista Brasileira de Atividade Física & Saúde. 2020;25:1-8.

41. Florindo AA, Nakamura PM, Farias Junior JC, et al. Promoção da atividade física e da alimentação saudável e a saúde da família em municípios com academia da saúde. Rev Bras Educ Fís Esporte. 2016;30(4):913-924.

42. Silva DAS, de Lima TR, Goncalves L. Academia da Saude program: mapping evidence from the largest health promotion community program in Brazil. Front Public Health. 2023;11:1227899.

43. Simoes EJ, Hallal PC, Siqueira FV, et al. Effectiveness of a scaled up physical activity intervention in Brazil: A natural experiment. Prev Med. 2017;103S:S66-S72.

44. Belizario-Silva F, Costa Reis D, Carvalho M, Leopoldo e Silva França R, John VM. Material intensity and embodied CO2 benchmark for reinforced concrete structures in Brazil. Journal of Building Engineering. 2024;82:108234.

45. da Silva JT, Garzillo JMF, Rauber F, et al. Greenhouse gas emissions, water footprint, and ecological footprint of food purchases according to their degree of processing in Brazilian metropolitan areas: a time-series study from 1987 to 2018. Lancet Planet Health. 2021;5(11):e775-e785.

46. Department for Transport. London Mini-Hollands. 2023. https://www.gov.uk/government/case-studies/london-mini-hollands.

47. Aldred R, Woodcock J, Goodman A. Major investment in active travel in Outer London: Impacts on travel behaviour, physical activity, and health. Journal of Transport & Health. 2021;20:100958.

48. Goodman A, Urban S, Aldred R. The Impact of Low Traffic Neighbourhoods and Other Active Travel Interventions on Vehicle Ownership: Findings from the Outer London Mini-Holland Programme. Findings. 2020.

49. Florindo AA, Reis RS, Farias Junior JC, Siqueira FV, Nakamura PM, Hallal PC. Description of health promotion actions in Brazilian cities that received funds to develop Academia da Saúde program. Brazilian Journal of Kinanthropometry and Human Performance. 2016;18(4):483-492.

**Additional supplement-only references cited in this file**

A1. Department for Energy Security and Net Zero. Greenhouse gas reporting: conversion factors 2025. London: UK Government; 2025. https://www.gov.uk/government/publications/greenhouse-gas-reporting-conversion-factors-2025.

A2. Ministério da Saúde, Brasil. Programa Academia da Saúde. Brasília: Ministério da Saúde. https://www.gov.br/saude/pt-br/composicao/saps/academia-da-saude.

A3. Ministério da Saúde, Brasil. Construção de polos do Programa Academia da Saúde. Brasília: Ministério da Saúde. https://www.gov.br/saude/pt-br/composicao/saps/academia-da-saude/construcao-de-polos.

A4. Ministério da Saúde, Brasil. Ministério da Saúde amplia os atendimentos contra a obesidade na atenção básica em três anos. Brasília: Ministério da Saúde; 2026.

A5. Empresa de Pesquisa Energética. Balanço Energético Nacional 2025: Ano base 2024 - Síntese. Rio de Janeiro: EPE; 2025.

A6. International Council on Clean Transportation. Avaliação do ciclo de vida das emissões de gases de efeito estufa de automóveis no Brasil. Washington, DC: ICCT; 2023.

# Supplementary File 5. Expanded implications, limitations, and future directions

## S5.1 Implications across the Eight Investments

**Supplementary Table S5a. Practical implications across the Eight Investments [1,4,11-19,27-29,38,40-43,49].**

| **Investment** | **What to measure** | **Low-carbon design strategy** | **Risk to avoid** |
| --- | --- | --- | --- |
| Whole-of-school programs | School-run mode/distance, active minutes, equipment, staff travel, heat/air-quality disruptions | Use school-day routines, active breaks, shaded play, school streets, walking school buses, and local facilities | Car-dependent after-school delivery or outdoor activity without heat/smoke safeguards |
| Active transport | Mode substitution, vehicle-km avoided, active minutes, infrastructure materials, maintenance | Protected networks, traffic calming, inclusive design, transit integration, and carbon payback monitoring | Counting walking/cycling as mitigation without measuring reduced motorized travel |
| Active urban design | Materials, land use, maintenance, lighting, irrigation, shade, use by subgroup | Compact mixed-use access, tree canopy, safe sidewalks, low-carbon materials, displacement safeguards | Green gentrification, unsafe environments, or over-crediting unverified carbon sequestration |
| Healthcare | Patient travel, referral location, facility energy, clinical time, digital tools, outcomes | Brief advice, home-based options, local social prescribing, community walking groups, active transport prescriptions | Sending patients to distant or car-dependent facilities without measuring travel |
| Public education | Reach, behavior change, production footprint, digital/print delivery, linked environmental change | Use campaigns to support infrastructure, school streets, workplace policy, and local access | High-reach campaigns with no structural pathway to behavior change |
| Sport/recreation | Participant/spectator travel, accommodation, facility energy, procurement, food, waste, participation equity | Local scheduling, reduced travel, efficient facilities, shared equipment, public transport, less merchandise | Travel-heavy competition models or sustainability claims based only on recycling |
| Workplaces | Commuting mode/distance, active minutes, facility use, incentives, staff travel | Walking meetings, stair prompts, flexible schedules, active commuting, bike access, local routes | Challenges that induce driving to distant gyms or exclude low-wage workers |
| Community-wide programs | Portfolio emissions, reach, car-km, facility use, infrastructure, distributional effects | Coordinate active transport, parks, schools, healthcare, and local programs under one PA-CARBON plan | Fragmented interventions that increase activity without reducing car dependence or improving resilience |

## S5.2 Interpreting climate cost without undermining health equity

PA-CARBON should not be used to rank interventions only by lowest kgCO2e. Physical activity promotion has health, social, equity, and adaptation goals that cannot be reduced to carbon efficiency. The purpose of carbon accounting is to identify avoidable emissions and improve design, not to withdraw services from populations that need them [1,3,4,6,30,36].

A program that serves older adults, people with disabilities, clinical populations, or communities with few safe outdoor options may have a larger footprint than a general-population walking campaign. That footprint may still be justified if the program delivers benefits that cannot be delivered safely through lower-carbon alternatives. The appropriate question is whether the same benefit could be delivered with less participant travel, lower facility energy, more durable equipment, better siting, or improved adaptation safeguards [18,19,30,36].

The necessity-versus-choice distinction is essential in low- and middle-income countries. High levels of active travel in a low-income community may reflect a lack of transport choices rather than healthy, safe, and desirable mobility. Climate-smart physical activity promotion should protect the right to safe, affordable, and voluntary mobility rather than romanticize constrained movement [36].

## S5.3 Limitations

**Supplementary Table S5b. Limitations and safeguards for PA-CARBON applications [6,8-10,18,19,21-30,36,38,50].**

| **Limitation** | **Safeguard** |
| --- | --- |
| Evidence synthesis | The review is targeted and methods-oriented, not a formal systematic review. The intent is framework development and demonstration; future work should perform systematic searches, risk-of-bias appraisal, and evidence grading. |
| Screening case studies | The calculations are illustrative. They use public sources and explicit assumptions but not audited bills of quantities, measured travel, metered facility energy, dietary data, or full consequential LCA. |
| Counterfactual uncertainty | Avoided emissions depend on what the intervention displaces. Walking or cycling is climate-beneficial only when it replaces motorized travel or reduces car ownership/use; community programs need measured substitution before claiming avoided emissions. |
| Food compensation | Incremental food demand is uncertain and population-specific. The manuscript treats food as sensitivity analysis, but better dietary data are needed, including diet quality, compensation, and plant-forward changes. |
| Equity and adaptation | Carbon efficiency is not a sufficient criterion for public-health value. A low-carbon strategy can be harmful if it increases heat exposure, excludes people with disabilities, worsens safety, or accelerates displacement. |
| Generalizability | Emission factors, grid intensity, diet, vehicle fleets, transport systems, construction practices, and climate hazards vary by country and year; local data should replace screening factors. |
| Scope | PA-CARBON does not replace GHG Protocol, ISO LCA, WHO HEAT, or sport/event calculators. It provides a physical-activity reporting layer that should be used with those tools when full assessment is required. |

## S5.4 Future research and policy agenda

**Supplementary Table S5c. Future research and policy agenda [1,3,4,6,8-10,27-30,36,50].**

| **Research area** | **Priority** |
| --- | --- |
| Measurement | Add carbon modules to physical activity trials, natural experiments, surveillance systems, sport-event registrations, and program evaluations. Minimum modules should include travel mode/distance, facility use, equipment, food, and counterfactual behavior. |
| Methods | Develop open-source PA-CARBON calculators linked to WHO HEAT, transport LCA, sport-event accounting, and health-economic models. Validate against full LCA studies and define uncertainty defaults. |
| Equity and adaptation | Quantify how carbon-efficient strategies perform under heat, air pollution, wildfire smoke, flooding, disability access, safety, gender, age, income, and displacement risk. |
| Implementation | Embed climate-cost reporting in funding calls, municipal active-living plans, school and workplace policies, healthcare referral pathways, and sport governance. |
| Global South and necessity | Study contexts where physical activity is already high because transport options are constrained. Climate-smart promotion should protect health and choice rather than romanticize necessity. |
| Policy synthesis | Systematically compare national physical activity plans, national adaptation plans, priority climate action plans, and transport plans to identify where physical activity climate co-benefits can be operationalized. |
| Case-study expansion | Apply PA-CARBON to parks, school streets, exercise referral, urban trails, bike-share, mass participation events, youth sport, gyms, pools, and community programs such as Academia da Saúde. |

## S5.5 Minimum PA-CARBON module for physical activity studies

**Supplementary Table S5d. Minimum PA-CARBON module for routine physical activity studies [12-19,27-29,38].**

| **Domain** | **Minimum variable** | **Preferred variable** |
| --- | --- | --- |
| Physical activity dose | Sessions, duration, frequency | Accelerometer, GPS, MET-hours, domain-specific activity |
| Travel | Mode and round-trip distance | Participant/staff/spectator travel by mode, occupancy, trip purpose, counterfactual |
| Facilities | Facility type and visits | Metered electricity, fuel, water, showers, pools/ice/HVAC allocation |
| Infrastructure/equipment | Major items and expected lifetime | Bill of quantities, procurement records, repair/replacement, embodied carbon factors |
| Food | Food provided or not; scenario assumption | Dietary compensation, food type, waste, plant-forward changes |
| Counterfactual | What activity/travel would have happened otherwise | Measured substitution through control group, travel diary, GPS, registration postcode, vehicle-km |
| Equity/adaptation | Subgroup reach and access barriers | Heat, shade, air quality, disability access, safety, affordability, displacement, climate resilience |

## References

*Reference numbers correspond to the main manuscript reference list.*

1. Hinckson E, Reis R, Romanello M, et al. Benefit of physical activity initiatives for climate change mitigation and adaptation. Nature Health. 2026;1(3):300-315.

3. Capdevila M, Villalonga-Olives E, Cunha I, Mena G, Lee E, Tremblay M. Physical activity, climate change and health - a conceptual model and scoping review. Lancet Planet Health. 2024;8:e574-e584.

4. Milton K, Cavill N, Chalkley A, et al. Eight Investments That Work for Physical Activity. J Phys Act Health. 2021;18(6):625-630.

6. Franco Silva M, Favarao Leao AL, O'Connor A, et al. Understanding the Relationships Between Physical Activity and Climate Change: An Umbrella Review. J Phys Act Health. 2024;21(12):1263-1275.

8. Lee EY, Park S, Kim YB, et al. Exploring the Interplay Between Climate Change, 24-Hour Movement Behavior, and Health: A Systematic Review. J Phys Act Health. 2024;21(12):1227-1245.

9. Abu-Omar K, Chevance G, Tcymbal A, Gelius P, Messing S. Physical activity promotion, human and planetary health - a conceptual framework and suggested research priorities. J Clim Chang Health. 2023;13:100262.

10. Bernard P, Chevance G, Kingsbury C, et al. Climate Change, Physical Activity and Sport: A Systematic Review. Sports Med. 2021;51(5):1041-1059.

11. Aldred R, Goodman A, Woodcock J. Impacts of active travel interventions on travel behaviour and health: Results from a five-year longitudinal travel survey in Outer London. Journal of Transport & Health. 2024;35:101771.

12. Brand C, Dons E, Anaya-Boig E, et al. The climate change mitigation effects of daily active travel in cities. Transportation Research Part D: Transport and Environment. 2021;93:102764.

13. Ding D, Luo M, Infante MFP, et al. The co-benefits of active travel interventions beyond physical activity: a systematic review. Lancet Planet Health. 2024;8(10):e790-e803.

14. Roaf E, Larrington-Spencer H, Lawlor ER. Interventions to increase active travel: A systematic review. Journal of Transport & Health. 2024;38:101860.

15. McCullough BP, Collins A, Roberts J, Villalobos S. Sport Events and Emissions Reporting: An Analysis of the Council for Responsible Sport Standard in Running Events. Sustainability. 2023;15(19):14375.

16. Wicker P. The carbon footprint of active sport participants. Sport Management Review. 2021;22(4):513-526.

17. Wilby RL, Orr M, Depledge D, et al. The impacts of sport emissions on climate: Measurement, mitigation, and making a difference. Annals of the New York Academy of Sciences. 2023;1519(1):20-33.

18. Lenzen M, Malik A, Li M, et al. The environmental footprint of health care: a global assessment. Lancet Planet Health. 2020;4(7):e271-e279.

19. Mizdrak A, Cobiac LJ, Cleghorn CL, Woodward A, Blakely T. Fuelling walking and cycling: human powered locomotion is associated with non-negligible greenhouse gas emissions. Sci Rep. 2020;10(1):9196.

21. Intergovernmental Panel on Climate Change. Climate Change 2022: Mitigation of Climate Change. Contribution of Working Group III to the Sixth Assessment Report. Cambridge: Cambridge University Press; 2022.

22. International Organization for Standardization. ISO 14040:2006 Environmental management - Life cycle assessment - Principles and framework. Geneva: ISO; 2006.

23. International Organization for Standardization. ISO 14044:2006 Environmental management - Life cycle assessment - Requirements and guidelines. Geneva: ISO; 2006.

24. International Organization for Standardization. ISO 14067:2018 Greenhouse gases - Carbon footprint of products - Requirements and guidelines for quantification. Geneva: ISO; 2018.

25. World Resources Institute, World Business Council for Sustainable Development. The GHG Protocol for Project Accounting. Washington, DC and Geneva: WRI/WBCSD; 2005.

26. World Resources Institute, World Business Council for Sustainable Development. Global Warming Potential Values. Washington, DC: GHG Protocol; 2024.

27. Kahlmeier S, Cavill N, Thondoo M, et al. The Health Economic Assessment Tool (HEAT) for walking and cycling - experiences from 10 years of application of a health impact assessment tool in policy and practice. Front Sports Act Living. 2023;5:1146761.

28. World Health Organization Regional Office for Europe. Health Economic Assessment Tool (HEAT) for walking and cycling. 2026. https://www.who.int/europe/tools-and-toolkits/health-economic-assessment-tool-for-walking-and-cycling.

29. California Department of Transportation. Evaluating the greenhouse gas reduction benefits of bicycle facilities. Sacramento, CA: California Department of Transportation; 2018.

30. Reis RS, Favarao Leao AL, Wang Y, Franco Silva M, Salvo D. Enhancing the Socioecological Model to Integrate Equity and Planetary Health: A Framework for Understanding Complex Interventions Shaping Population Health and Active Living. J Phys Act Health. 2026;23(4):501-514.

36. Salvo D, Jauregui A, Adlakha D, Sarmiento OL, Reis RS. When Moving Is the Only Option: The Role of Necessity Versus Choice for Understanding and Promoting Physical Activity in Low- and Middle-Income Countries. Annu Rev Public Health. 2023;44:151-169.

38. Herold DM, Breitbarth T, Hergesell A, Schulenkorf N. Sport events and the environment: Assessing the carbon footprint of spectators' modal choices at professional football games in Austria. J Clean Prod. 2024;452:142259.

40. Faria TMTR, Brenner S, Deckert A, Florindo AA, Mielke GI. Health Academy Program and physical activity levels in Brazilian state capitals. Revista Brasileira de Atividade Física & Saúde. 2020;25:1-8.

41. Florindo AA, Nakamura PM, Farias Junior JC, et al. Promoção da atividade física e da alimentação saudável e a saúde da família em municípios com academia da saúde. Rev Bras Educ Fís Esporte. 2016;30(4):913-924.

42. Silva DAS, de Lima TR, Goncalves L. Academia da Saude program: mapping evidence from the largest health promotion community program in Brazil. Front Public Health. 2023;11:1227899.

43. Simoes EJ, Hallal PC, Siqueira FV, et al. Effectiveness of a scaled up physical activity intervention in Brazil: A natural experiment. Prev Med. 2017;103S:S66-S72.

49. Florindo AA, Reis RS, Farias Junior JC, Siqueira FV, Nakamura PM, Hallal PC. Description of health promotion actions in Brazilian cities that received funds to develop Academia da Saúde program. Brazilian Journal of Kinanthropometry and Human Performance. 2016;18(4):483-492.

50. Ramírez Varela A, Bauman A, Woods CB, et al. Low global physical activity despite two decades of policy progress. Nature Health. 2026;1(3):338-354.
